# Supplementary material for: Transcriptomic analysis identifies upregulation of secreted phosphoprotein 1 in silicotic rats
Source: PubMed Central journal article supplement — Exp Ther Med. 2021 Mar 31;21(6):579. doi: 10.3892/etm.2021.10011 (PMC8027763; doi:10.3892/etm.2021.10011), 2021-03-31
Supplement: Supplementary_Data1.pdf [file Supplementary_Data1.pdf]

Table SI. Occupational history of patients exposed to silica.

| Group            | N, number | Age, years | Inhalation of dust, years |
|------------------|-----------|------------|---------------------------|
| Negative control | 9         | 48.0±7.0   | 14.8±3.0                  |
| Silicosis        | 18        | 46.7±5.2   | 15.2±8.8                  |
| t-value          |           |            | -0.181                    |
| P-value          |           |            | 0.858                     |

Table SVII. Correlation analysis between lung function index and SPP1.

|      |         | VC-MAX<br>(L)     | FVC<br>(L)         | FEV 1<br>(L)       | FEF75<br>(L/s)     | TLC-He<br>(L)      | FRC-He<br>(L)     | RV-He<br>(L)      | TLCO SB<br>(mmol/min/kpa) | VA<br>(L)          |
|------|---------|-------------------|--------------------|--------------------|--------------------|--------------------|-------------------|-------------------|---------------------------|--------------------|
| SPP1 | R-value | -0.45             | -0.47              | -0.38              | -0.54              | -0.58              | -0.44             | -0.43             | -0.41                     | -0.59              |
|      | P-value | 0.02 <sup>a</sup> | 0.013 <sup>a</sup> | 0.048 <sup>a</sup> | 0.004 <sup>a</sup> | 0.002 <sup>a</sup> | 0.02 <sup>a</sup> | 0.03 <sup>a</sup> | 0.03 <sup>a</sup>         | 0.001 <sup>a</sup> |

<sup>a</sup>Compared with negative control group, P<0.05. SPP1, secreted phosphoprotein 1; VC, vital capacity; FVC, forced vital capacity; FEV1, forced expiratory volume in the first second; FEF75, forced expiratory flow 75; TLC, total lung capacity; FRC, functional residual capacity; RV, residual volume; TLCO SB, carbon monoxide transfer factor determined in single breath; VA, alveolar ventilation.
